# Supplementary material for: A Computational Clonal Analysis of the Developing Mouse Limb Bud
Source: PLOS journal article supplement (doi:10.1371/journal.pcbi.1001071), 2011-02-10
Supplement: S2 (10.1371/journal.pcbi.1001071.s002) [file journal.pcbi.1001071.s002]

**Figure S2: Analysis of the clonal data (PD and AP length measurement)**

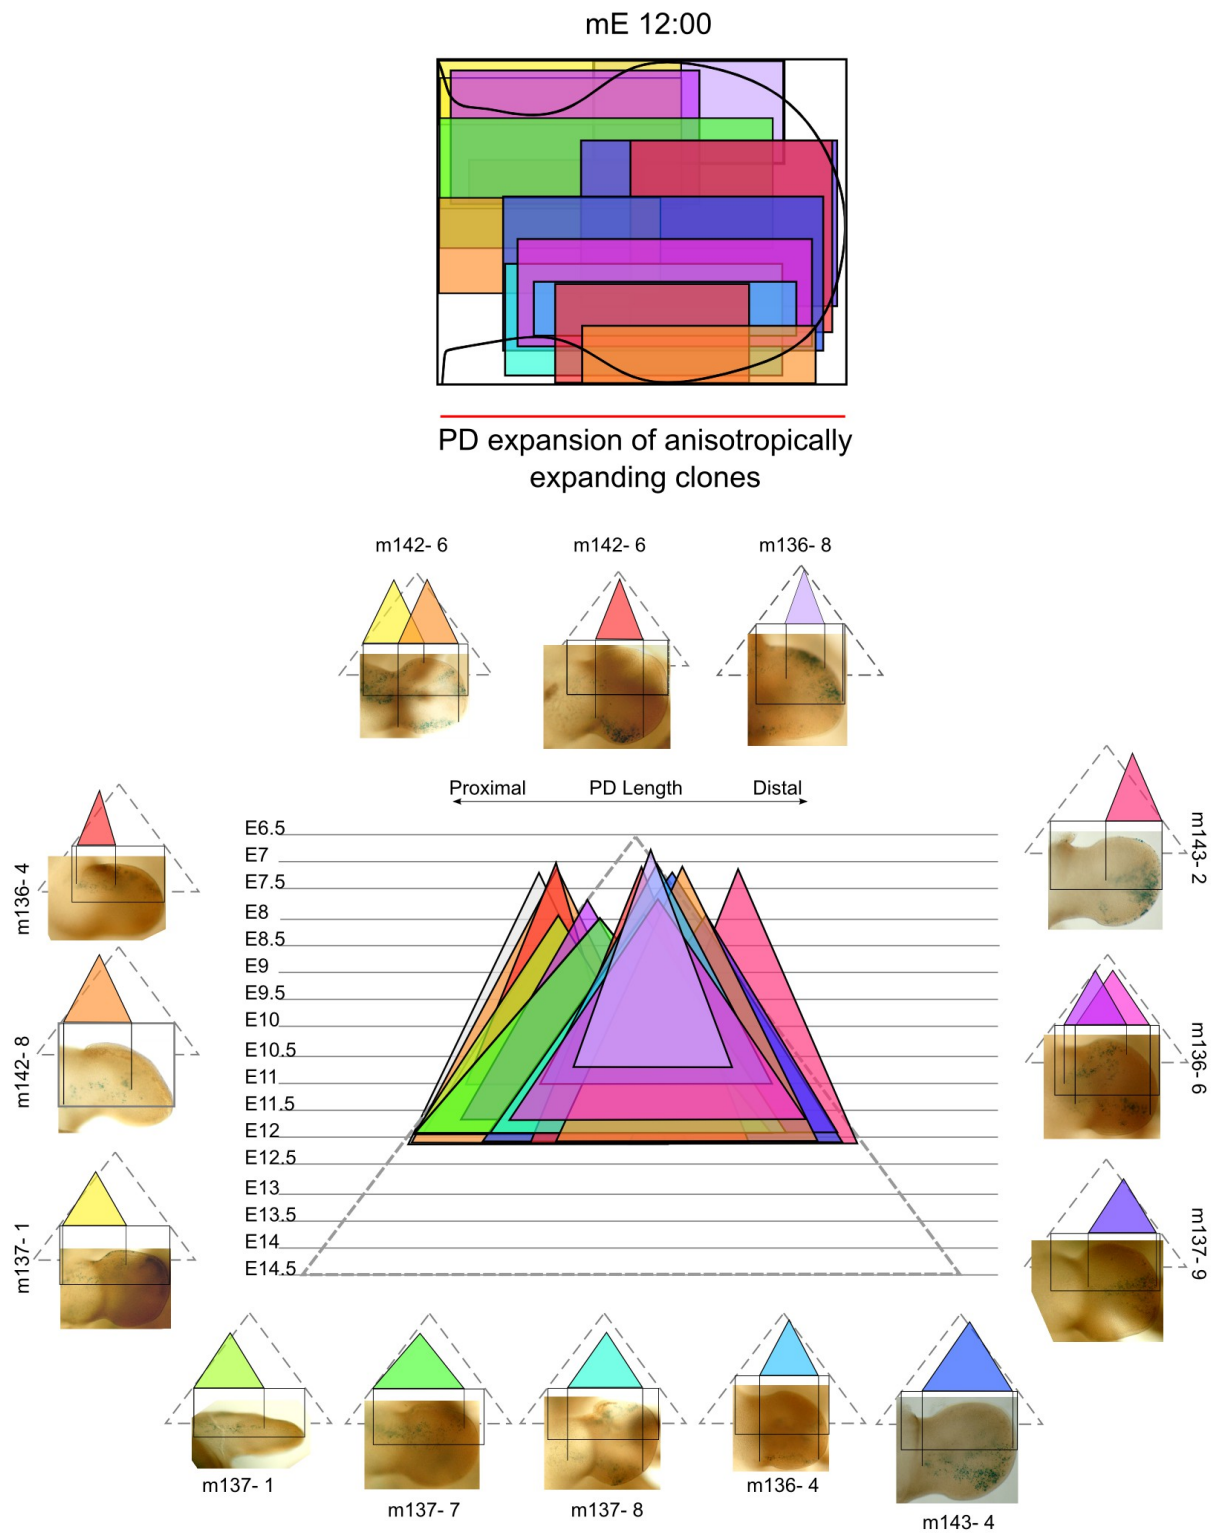

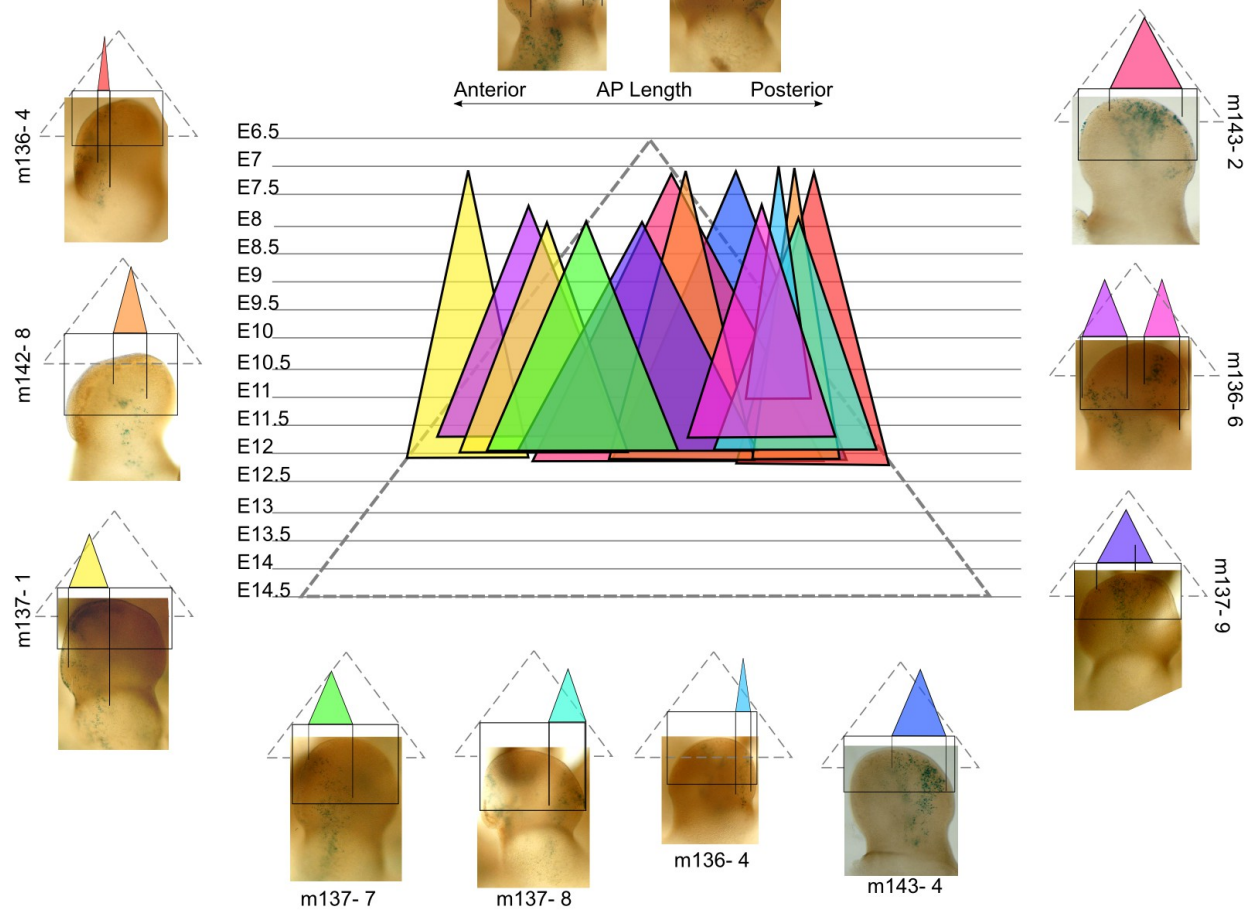

mE 12:00

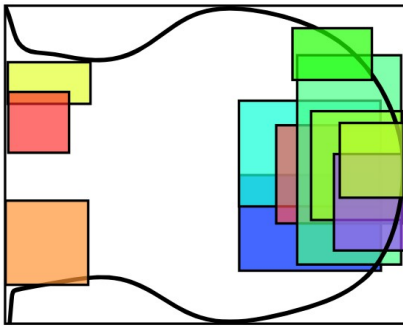

## PD expansion of isotropically expanding clones

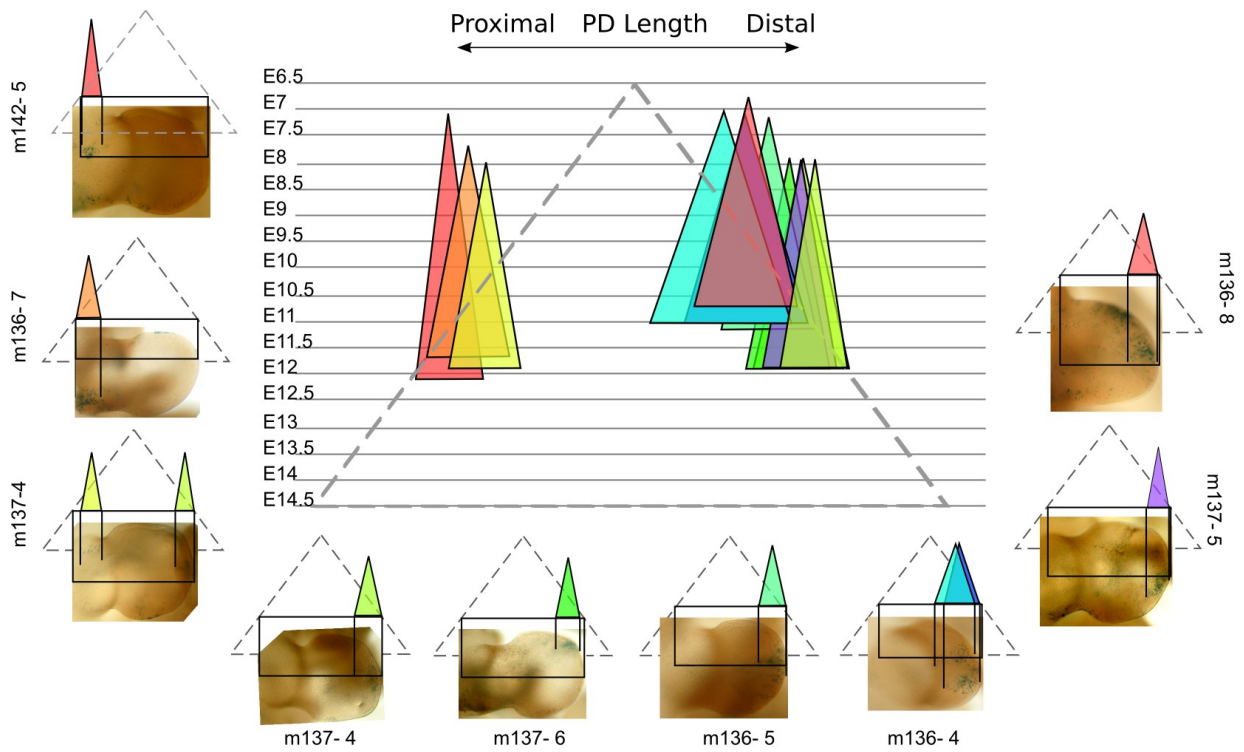

mE 12:00

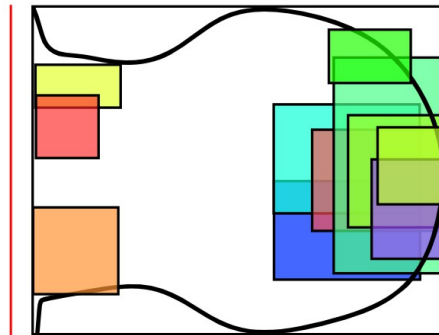

AP expansion of isotropically  
expanding clones

Anterior AP Length Posterior

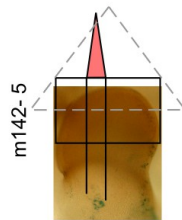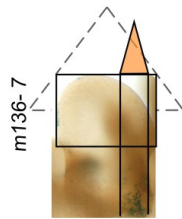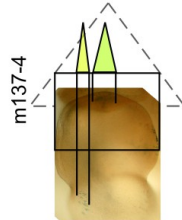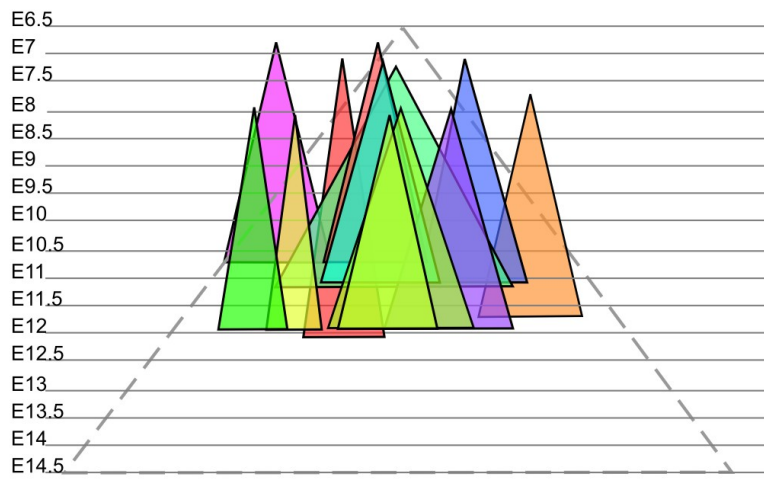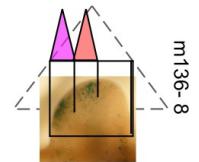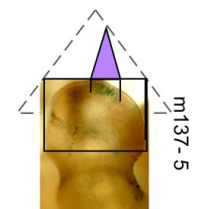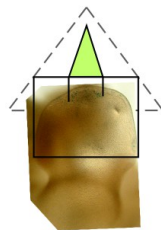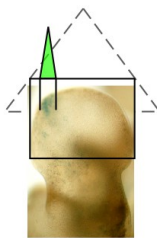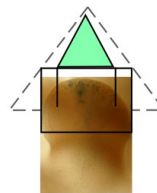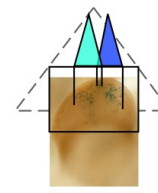

m137-4

m137-6

m136-5

m136-4
