# Supplementary material for: A Computational Clonal Analysis of the Developing Mouse Limb Bud
Source: PLOS journal article supplement (doi:10.1371/journal.pcbi.1001071), 2011-02-10

**Figure S5: Clone scores of the tissue movement maps in Figure 4**

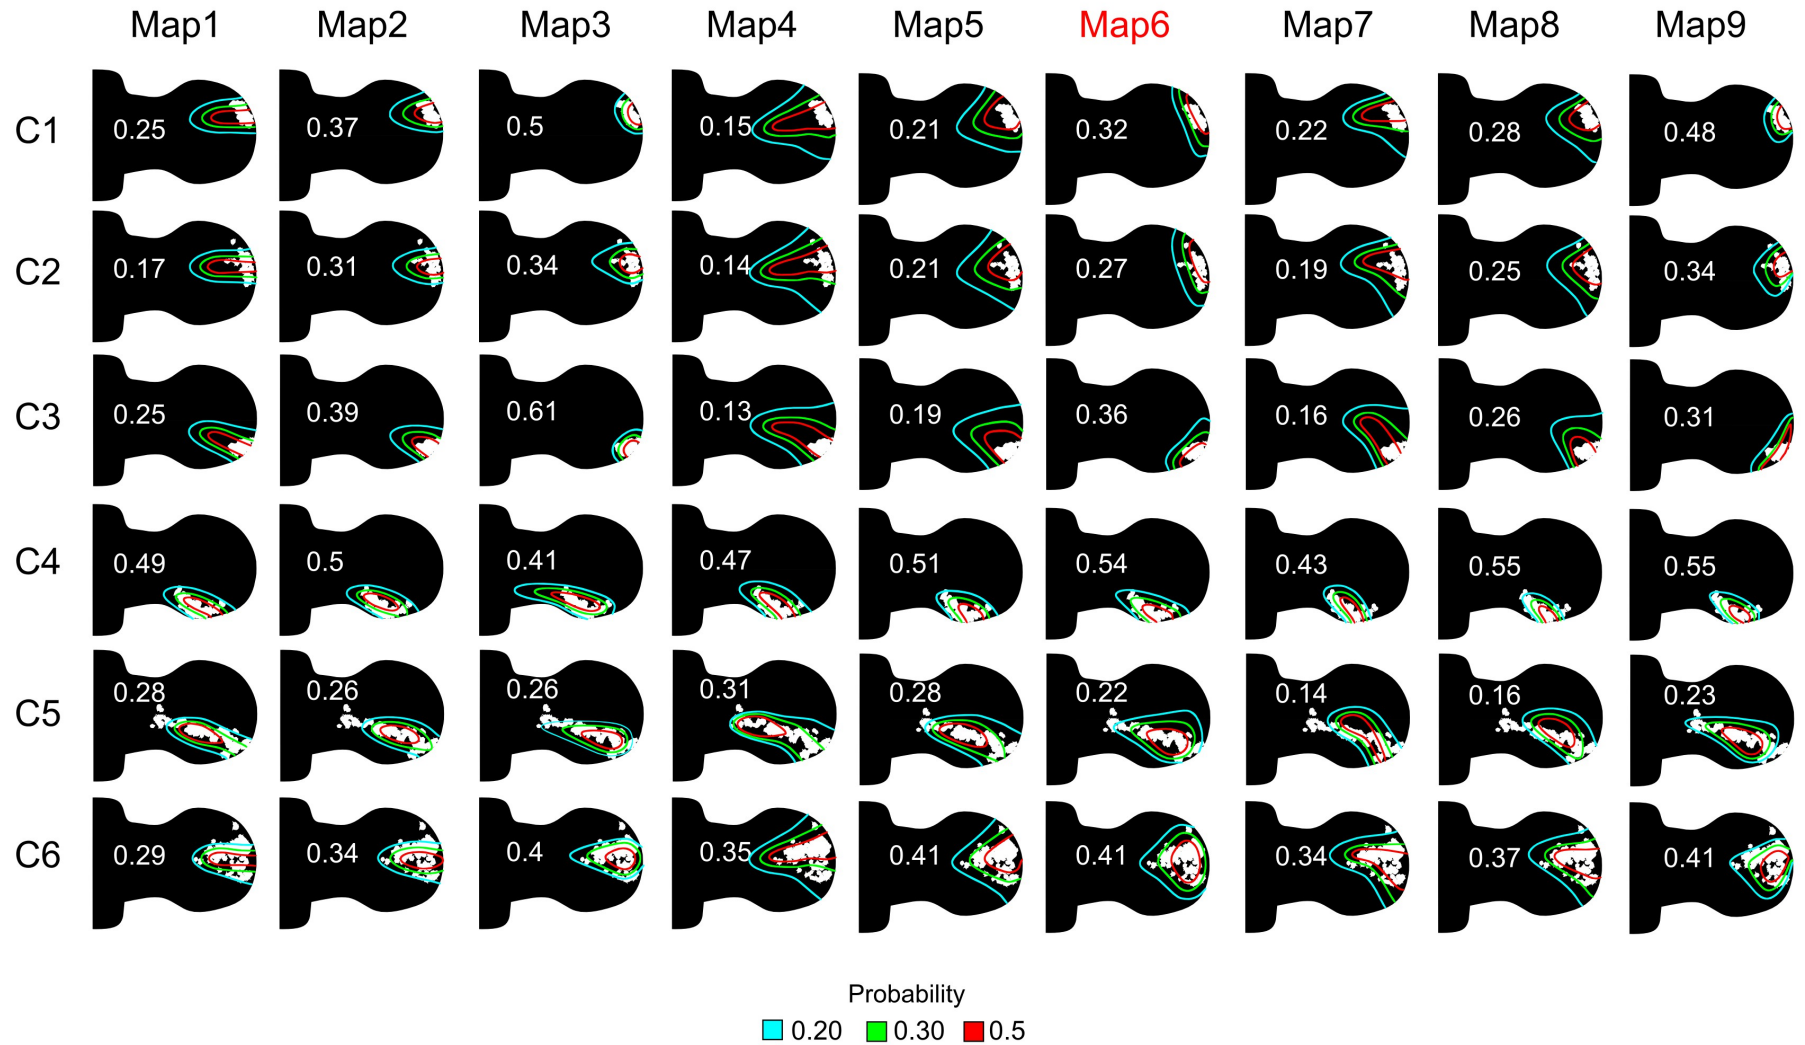

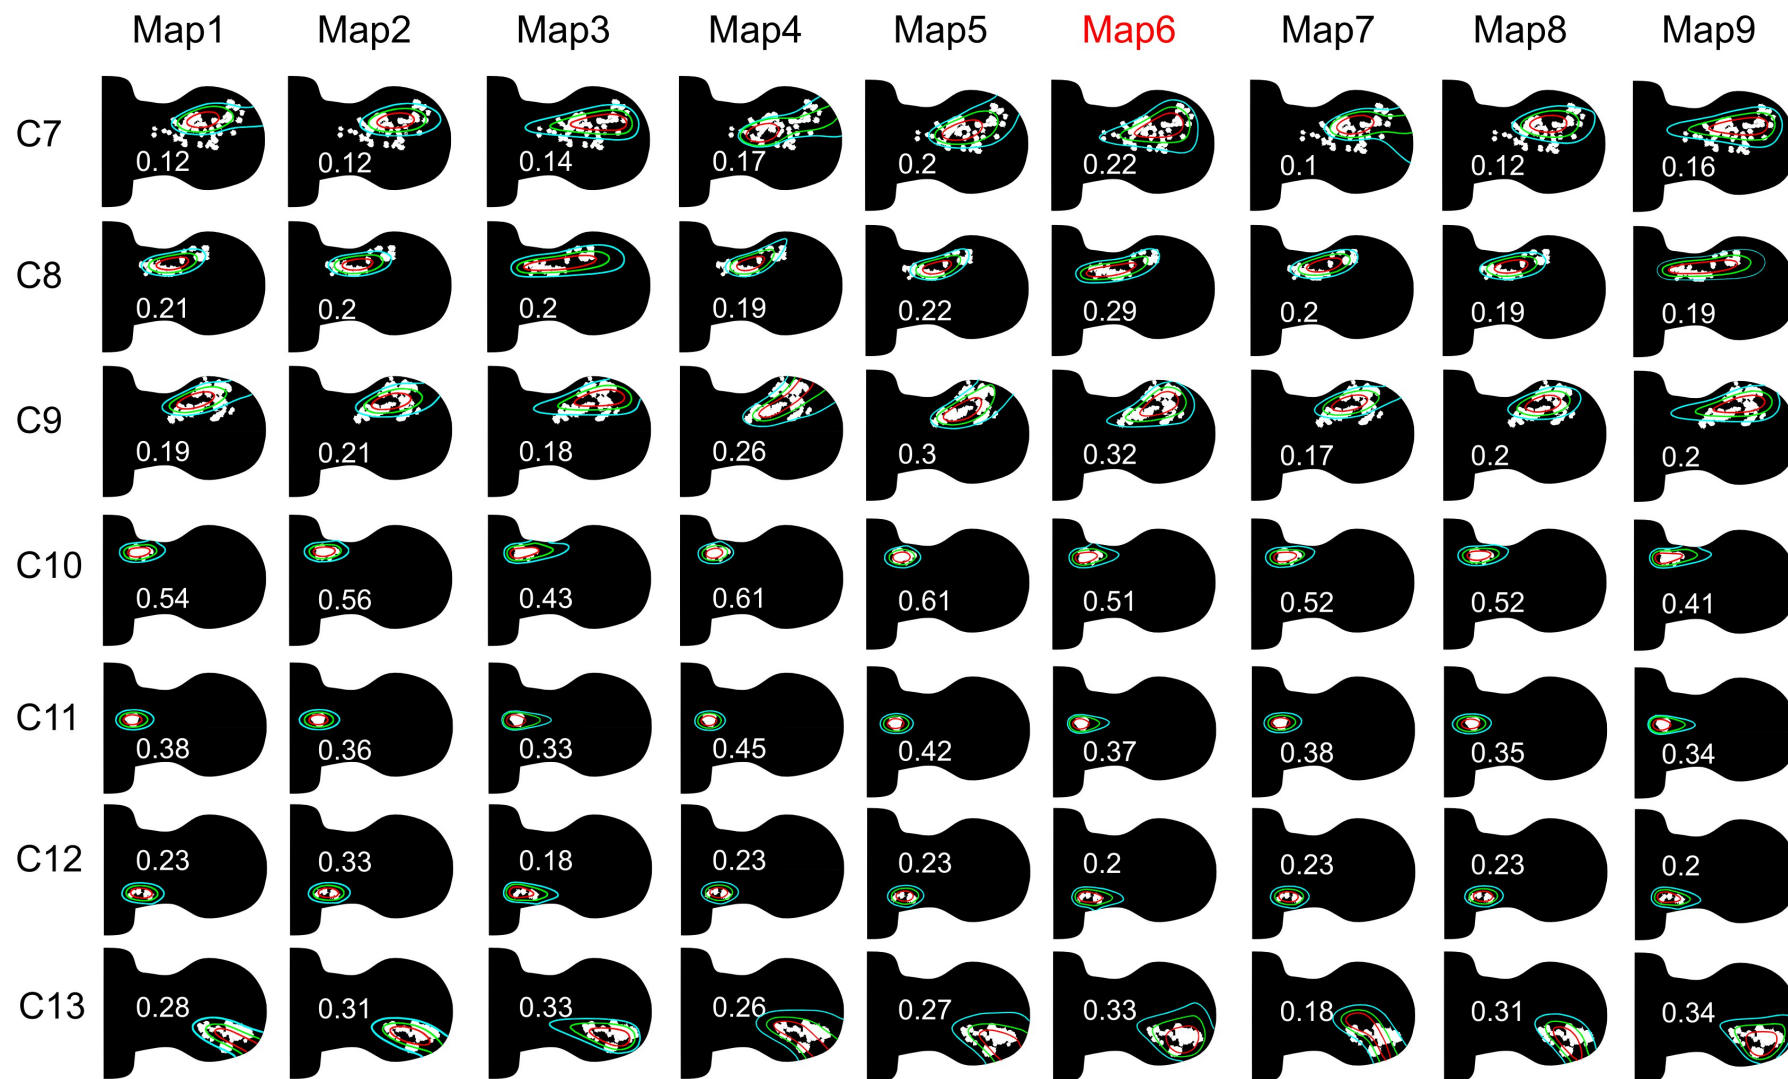

Probability  
■ 0.20 ■ 0.30 ■ 0.5

## Summary

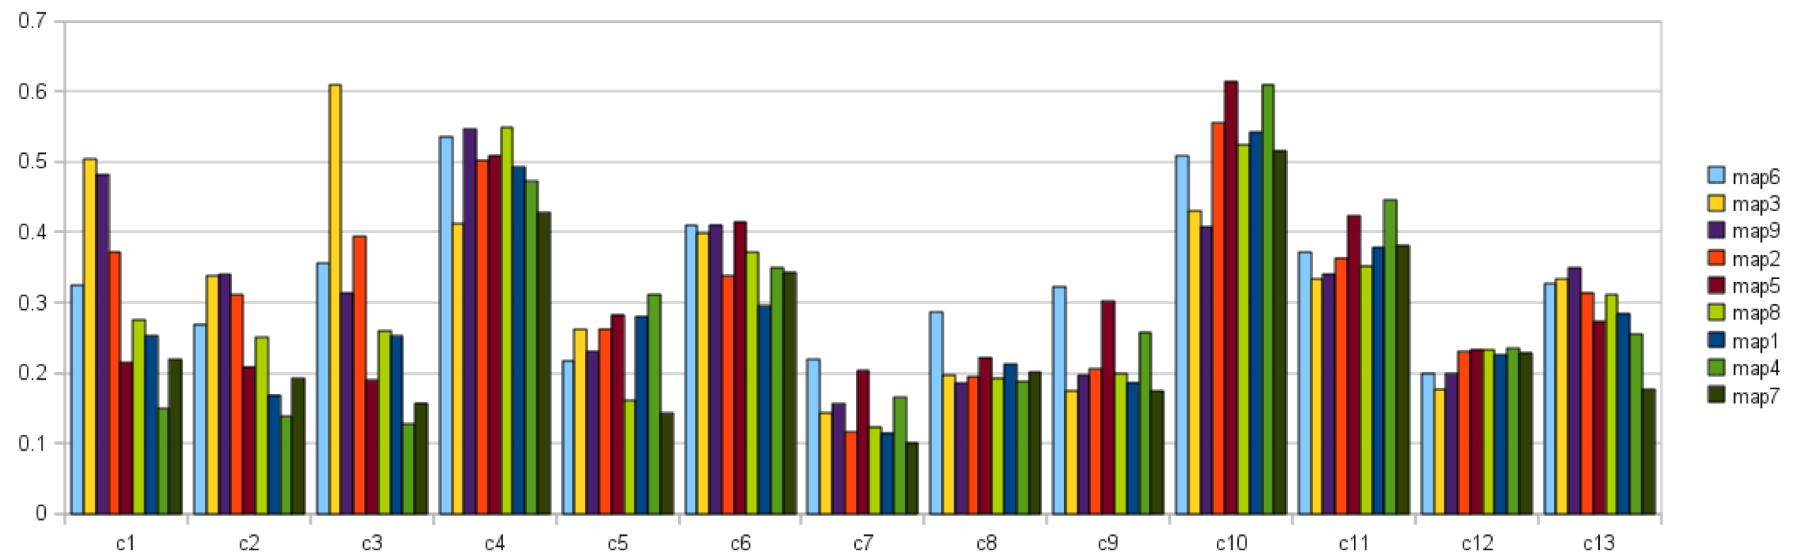

Supplement: S5 (10.1371/journal.pcbi.1001071.s005) [file journal.pcbi.1001071.s005]
