# Supplementary material for: A Computational Clonal Analysis of the Developing Mouse Limb Bud
Source: PLOS journal article supplement (doi:10.1371/journal.pcbi.1001071), 2011-02-10
Supplement: S6 (10.1371/journal.pcbi.1001071.s006) [file journal.pcbi.1001071.s006]

301 Moved Permanently

# Moved Permanently

The document has moved here.

---

Apache Server at www.ploscompbiol.org Port 80
