# Supplementary material for: A Computational Clonal Analysis of the Developing Mouse Limb Bud
Source: PLOS journal article supplement (doi:10.1371/journal.pcbi.1001071), 2011-02-10
Supplement: S7 (10.1371/journal.pcbi.1001071.s007) [file journal.pcbi.1001071.s007]

**Text S2: Simulation with a refined triangular mesh**

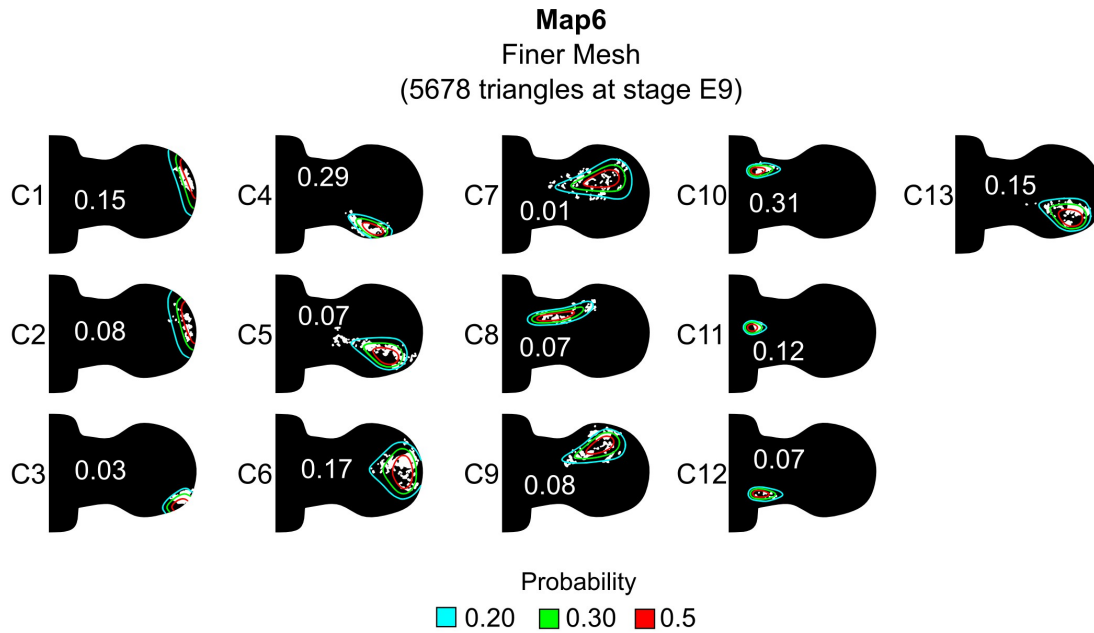

A version of Map6 with a finer mesh was generated. Using the initial positions that were optimized for the version of Map6 obtained with a coarser mesh, we computed and evaluated the 13 virtual clones on the finer mesh. Results were in agreement with the virtual clones obtained with the original mesh.

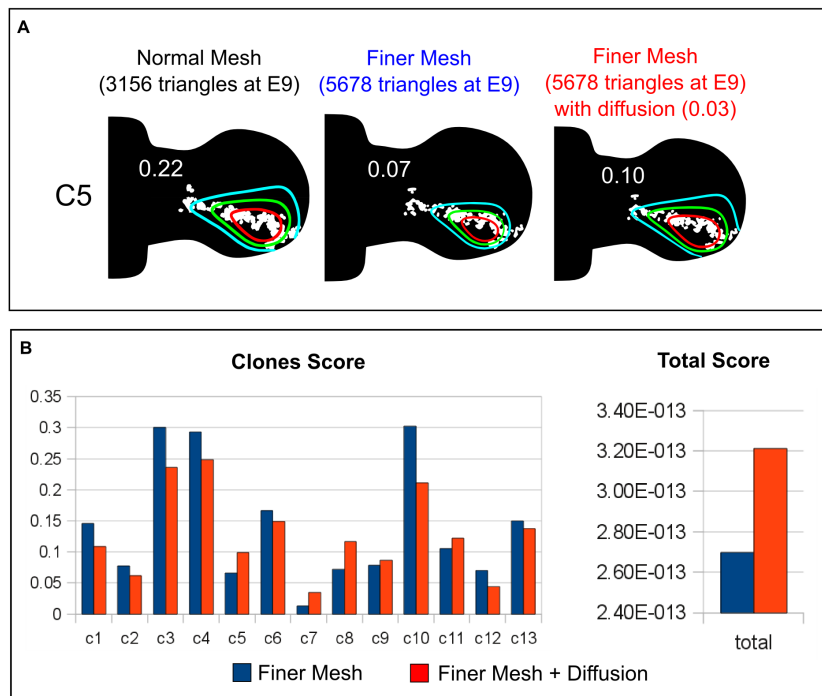

**A)** Example of clone generated with the Map6 on a finer Mesh and with Map6 on a finer mesh plus an additional diffusion term increasing cell mixing. **B)** Clone scores and Total score for Map6 on the finer mesh with and without diffusion.
